# Supplementary material
Source: PubMed Central journal article supplement (PMC4998980)
Supplement: supp_mcw119_aob-16113-s02.pdf [file supp_mcw119_aob-16113-s02.pdf]

Suppl. Table 1: A) Results from *post hoc* pairwise comparisons between the groups FMH Ericaceae, PMH Ericaceae, autotrophic Ericaceae among the references and remaining autotrophic references (REF) with the non-parametric Mann-Whitney U-test after significant Kruskal-Wallis *H*-test ( $\epsilon^{13}\text{C}$ :  $H = 396.900$ ,  $df = 3$ ,  $P < 0.001$ ;  $\epsilon^{15}\text{N}$ :  $H = 1365.375$ ,  $df = 3$ ,  $P < 0.001$ ; N concentration:  $H = 70.596$ ,  $df = 3$ ,  $P < 0.001$ ). *P*-values were adjusted using the sequential Bonferroni-correction. B) Results from effect-size calculations.

A)

| $\epsilon^{13}\text{C}$ | FMH Ericaceae | PMH Ericaceae | autotrophic Ericaceae |
|-------------------------|---------------|---------------|-----------------------|
| PMH Ericaceae           | < 0.001       | -             | -                     |
| autotrophic Ericaceae   | < 0.001       | < 0.001       | -                     |
| remaining REF           | < 0.001       | 0.002         | < 0.001               |

| $\epsilon^{15}\text{N}$ | FMH Ericaceae | PMH Ericaceae | autotrophic Ericaceae |
|-------------------------|---------------|---------------|-----------------------|
| PMH Ericaceae           | < 0.001       | -             | -                     |
| autotrophic Ericaceae   | < 0.001       | < 0.001       | -                     |
| remaining REF           | < 0.001       | < 0.001       | < 0.001               |

| N concentration       | FMH Ericaceae | PMH Ericaceae | autotrophic Ericaceae |
|-----------------------|---------------|---------------|-----------------------|
| PMH Ericaceae         | 1,000         | -             | -                     |
| autotrophic Ericaceae | 0.027         | < 0.001       | -                     |
| remaining REF         | 0.010         | < 0.001       | < 0.001               |

B)

| $\epsilon^{13}\text{C}$ | FMH Ericaceae | PMH Ericaceae | autotrophic Ericaceae |
|-------------------------|---------------|---------------|-----------------------|
| PMH Ericaceae           | 3.544         | -             | -                     |
| autotrophic Ericaceae   | 4.574         | 0.524         | -                     |
| remaining REF           | 4.140         | 0.205         | 0.366                 |

| $\epsilon^{15}\text{N}$ | FMH Ericaceae | PMH Ericaceae | autotrophic Ericaceae |
|-------------------------|---------------|---------------|-----------------------|
| PMH Ericaceae           | 2.138         | -             | -                     |
| autotrophic Ericaceae   | 4.396         | 2.065         | -                     |
| remaining REF           | 4.590         | 2.295         | 0.419                 |

| N concentration       | FMH Ericaceae | PMH Ericaceae | autotrophic Ericaceae |
|-----------------------|---------------|---------------|-----------------------|
| PMH Ericaceae         | 0.040         | -             | -                     |
| autotrophic Ericaceae | 0.303         | 0.352         | -                     |
| remaining REF         | 0.381         | 0.358         | 0.622                 |
