# Supplementary material
Source: PubMed Central journal article supplement (PMC4998980)
Supplement: supp_mcw119_aob-16113-s03.pdf [file supp_mcw119_aob-16113-s03.pdf]

Suppl. Table 2: Mean enrichment factors  $\epsilon^{13}\text{C}$  and  $\epsilon^{15}\text{N}$ , mean nitrogen concentration data [mmol g<sub>dw</sub><sup>-1</sup>], standard deviation (SD) and number of samples (n) for each fully mycoheterotrophic (FMH) and partially mycoheterotrophic (PMH) Ericaceae and Orchidaceae species.

|                  |                              | N conc.     |                             |                             |                                       |
|------------------|------------------------------|-------------|-----------------------------|-----------------------------|---------------------------------------|
| Species          |                              |             | $\epsilon^{15}\text{N}$ [‰] | $\epsilon^{13}\text{C}$ [‰] | [mmol g <sub>dw</sub> <sup>-1</sup> ] |
| <b>Ericaceae</b> |                              |             |                             |                             |                                       |
| <b>FMH</b>       | <i>Hypopitys monotropa</i>   | <b>mean</b> | 12.57                       | 6.80                        | 1.07                                  |
|                  |                              | <b>SD</b>   | 2.67                        | 1.71                        | 0.23                                  |
|                  |                              | <b>n</b>    | 38                          | 38                          | 31                                    |
| <b>FMH</b>       | <i>Monotropa uniflora</i>    | <b>mean</b> | 11.34                       | 7.28                        | 1.08                                  |
|                  |                              | <b>SD</b>   | 1.73                        | 0.67                        | 0.18                                  |
|                  |                              | <b>n</b>    | 8                           | 8                           | 8                                     |
| <b>FMH</b>       | <i>Pterospora andromedea</i> | <b>mean</b> | 9.45                        | 4.82                        | 1.37                                  |
|                  |                              | <b>SD</b>   | 1.24                        | 1.62                        | 0.27                                  |
|                  |                              | <b>n</b>    | 34                          | 34                          | 32                                    |
| <b>FMH</b>       | <i>Pyrola aphylla</i>        | <b>mean</b> | 17.80                       | 6.92                        | 1.47                                  |
|                  |                              | <b>SD</b>   | 2.74                        | 0.86                        | 0.39                                  |
|                  |                              | <b>n</b>    | 39                          | 39                          | 37                                    |
| <b>FMH</b>       | <i>Sarcodes sanguinea</i>    | <b>mean</b> | 14.42                       | 5.16                        | 0.68                                  |
|                  |                              | <b>SD</b>   | 1.98                        | 1.59                        | 0.15                                  |
|                  |                              | <b>n</b>    | 15                          | 15                          | 15                                    |
| <hr/>            |                              |             |                             |                             |                                       |
| <b>PMH</b>       | <i>Chimaphila umbellata</i>  | <b>mean</b> | 5.41                        | -0.56                       | 1.08                                  |
|                  |                              | <b>SD</b>   | 2.51                        | 1.41                        | 0.31                                  |
|                  |                              | <b>n</b>    | 138                         | 138                         | 132                                   |
| <b>PMH</b>       | <i>Moneses uniflora</i>      | <b>mean</b> | 2.53                        | -0.36                       | 1.60                                  |
|                  |                              | <b>SD</b>   | 1.33                        | 1.58                        | 0.42                                  |
|                  |                              | <b>n</b>    | 99                          | 99                          | 99                                    |
| <b>PMH</b>       | <i>Orthilia secunda</i>      | <b>mean</b> | 5.14                        | 1.28                        | 1.05                                  |
|                  |                              | <b>SD</b>   | 2.68                        | 1.46                        | 0.26                                  |
|                  |                              | <b>n</b>    | 140                         | 140                         | 134                                   |
| <b>PMH</b>       | <i>Pyrola chlorantha</i>     | <b>mean</b> | 7.91                        | 0.68                        | 1.25                                  |
|                  |                              | <b>SD</b>   | 2.76                        | 1.21                        | 0.26                                  |
|                  |                              | <b>n</b>    | 116                         | 116                         | 110                                   |

|            |                            |             |       |       |      |
|------------|----------------------------|-------------|-------|-------|------|
| <b>PMH</b> | <i>Pyrola japonica</i>     | <b>mean</b> | 10.96 | 3.12  | 1.41 |
|            |                            | <b>SD</b>   | 1.38  | 1.31  | 0.15 |
|            |                            | <b>n</b>    | 5     | 5     | 5    |
| <b>PMH</b> | <i>Pyrola minor</i>        | <b>mean</b> | 3.36  | -0.13 | 1.24 |
|            |                            | <b>SD</b>   | 1.25  | 0.74  | 0.25 |
|            |                            | <b>n</b>    | 48    | 48    | 48   |
| <b>PMH</b> | <i>Pyrola picta</i>        | <b>mean</b> | 10.38 | 0.38  | 1.31 |
|            |                            | <b>SD</b>   | 1.91  | 1.52  | 0.28 |
|            |                            | <b>n</b>    | 54    | 54    | 51   |
| <b>PMH</b> | <i>Pyrola rotundifolia</i> | <b>mean</b> | 9.64  | 3.56  | NA   |
|            |                            | <b>SD</b>   | 0.73  | 0.45  | NA   |
|            |                            | <b>n</b>    | 6     | 6     | 0    |

---

### Orchidaceae

|            |                                        |             |       |       |      |
|------------|----------------------------------------|-------------|-------|-------|------|
| <b>FMH</b> | <i>Aphyllorchis caudata</i>            | <b>mean</b> | 7.20  | 8.36  | 1.95 |
|            |                                        | <b>SD</b>   | 2.26  | 0.04  | 1.04 |
|            |                                        | <b>n</b>    | 3     | 3     | 3    |
| <b>FMH</b> | <i>Aphyllorchis montana</i>            | <b>mean</b> | 10.86 | 10.34 | 2.63 |
|            |                                        | <b>SD</b>   | 0.64  | 0.50  | 0.52 |
|            |                                        | <b>n</b>    | 4     | 4     | 4    |
| <b>FMH</b> | <i>Cephalanthera damasonium</i> albino | <b>mean</b> | 13.27 | 9.26  | 4.03 |
|            |                                        | <b>SD</b>   | 1.49  | 0.87  | 0.23 |
|            |                                        | <b>n</b>    | 10    | 10    | 10   |
| <b>FMH</b> | <i>Cephalanthera exigua</i>            | <b>mean</b> | 13.60 | 8.70  | 3.12 |
|            |                                        | <b>SD</b>   | 2.92  | 0.94  | 0.49 |
|            |                                        | <b>n</b>    | 5     | 5     | 5    |
| <b>FMH</b> | <i>Cephalanthera longifolia</i> albino | <b>mean</b> | 11.76 | 6.58  | 3.76 |
|            |                                        | <b>SD</b>   | 1.61  | 0.24  | 0.24 |
|            |                                        | <b>n</b>    | 9     | 9     | 9    |
| <b>FMH</b> | <i>Corallorhiza maculata</i>           | <b>mean</b> | 13.60 | 7.05  | 1.81 |
|            |                                        | <b>SD</b>   | 2.09  | 1.25  | 0.49 |
|            |                                        | <b>n</b>    | 15    | 15    | 15   |
| <b>FMH</b> | <i>Corallorhiza striata</i>            | <b>mean</b> | 10.38 | 9.57  | 2.26 |
|            |                                        | <b>SD</b>   | 0.66  | 1.02  | 0.43 |
|            |                                        | <b>n</b>    | 3     | 3     | 3    |

|       |                                 |             |       |       |      |
|-------|---------------------------------|-------------|-------|-------|------|
| FMH   | <i>Cymbidium aberrans</i>       | <b>mean</b> | 13.99 | 10.78 | 1.23 |
|       |                                 | <b>SD</b>   | 1.59  | 0.62  | 0.20 |
|       |                                 | <b>n</b>    | 3     | 3     | 3    |
| FMH   | <i>Cymbidium macrorhizon</i>    | <b>mean</b> | 12.15 | 9.52  | 1.52 |
|       |                                 | <b>SD</b>   | 1.88  | 1.09  | 0.48 |
|       |                                 | <b>n</b>    | 6     | 6     | 6    |
| FMH   | <i>Epipogium aphyllum</i>       | <b>mean</b> | 7.46  | 8.96  | 3.03 |
|       |                                 | <b>SD</b>   | 2.92  | 0.70  | 0.56 |
|       |                                 | <b>n</b>    | 8     | 8     | 8    |
| FMH   | <i>Lecanorchis nigricans</i>    | <b>mean</b> | 16.42 | 7.91  | 1.97 |
|       |                                 | <b>SD</b>   | 1.03  | 0.10  | 0.50 |
|       |                                 | <b>n</b>    | 3     | 3     | 3    |
| FMH   | <i>Lecanorchis thalassica</i>   | <b>mean</b> | 8.83  | 8.03  | 2.20 |
|       |                                 | <b>SD</b>   | 2.66  | 1.03  | 0.41 |
|       |                                 | <b>n</b>    | 5     | 5     | 5    |
| FMH   | <i>Neottia nidus-avis</i>       | <b>mean</b> | 11.02 | 7.53  | 2.45 |
|       |                                 | <b>SD</b>   | 2.98  | 1.18  | 0.64 |
|       |                                 | <b>n</b>    | 52    | 52    | 38   |
| <hr/> |                                 |             |       |       |      |
| PMH   | <i>Cephalanthera damasonium</i> | <b>mean</b> | 9.91  | 4.29  | 2.91 |
|       |                                 | <b>SD</b>   | 3.38  | 2.28  | 0.40 |
|       |                                 | <b>n</b>    | 39    | 43    | 39   |
| PMH   | <i>Cephalanthera erecta</i>     | <b>mean</b> | 6.46  | 2.45  | 3.79 |
|       |                                 | <b>SD</b>   | 1.99  | 0.53  | 0.09 |
|       |                                 | <b>n</b>    | 3     | 3     | 3    |
| PMH   | <i>Cephalanthera longifolia</i> | <b>mean</b> | 6.72  | 1.90  | 2.63 |
|       |                                 | <b>SD</b>   | 2.39  | 1.78  | 0.51 |
|       |                                 | <b>n</b>    | 42    | 42    | 42   |
| PMH   | <i>Cephalanthera rubra</i>      | <b>mean</b> | 6.38  | 1.37  | 2.49 |
|       |                                 | <b>SD</b>   | 1.81  | 1.30  | 0.43 |
|       |                                 | <b>n</b>    | 25    | 25    | 25   |
| PMH   | <i>Corallorhiza trifida</i>     | <b>mean</b> | 6.11  | 6.90  | 1.56 |
|       |                                 | <b>SD</b>   | 1.17  | 1.02  | 0.30 |
|       |                                 | <b>n</b>    | 9     | 9     | 4    |

|     |                              |             |       |      |      |
|-----|------------------------------|-------------|-------|------|------|
| PMH | <i>Cymbidium goeringii</i>   | <b>mean</b> | 7.74  | 4.04 | 1.50 |
|     |                              | <b>SD</b>   | 3.86  | 2.59 | 0.35 |
|     |                              | <b>n</b>    | 7     | 7    | 7    |
| PMH | <i>Cymbidium lancifolium</i> | <b>mean</b> | 11.25 | 4.54 | 1.90 |
|     |                              | <b>SD</b>   | 1.01  | 2.15 | 0.48 |
|     |                              | <b>n</b>    | 6     | 6    | 6    |
| PMH | <i>Epipactis atrorubens</i>  | <b>mean</b> | 10.83 | 2.28 | 2.33 |
|     |                              | <b>SD</b>   | 3.49  | 1.57 | 0.30 |
|     |                              | <b>n</b>    | 11    | 11   | 11   |
| PMH | <i>Epipactis distans</i>     | <b>mean</b> | 16.36 | 2.38 | 2.47 |
|     |                              | <b>SD</b>   | 3.64  | 1.92 | 0.11 |
|     |                              | <b>n</b>    | 4     | 4    | 4    |
| PMH | <i>Epipactis helleborine</i> | <b>mean</b> | 13.02 | 2.56 | 2.76 |
|     |                              | <b>SD</b>   | 4.40  | 2.70 | 0.66 |
|     |                              | <b>n</b>    | 21    | 21   | 21   |
| PMH | <i>Epipactis leptochila</i>  | <b>mean</b> | 22.16 | 5.54 | 4.69 |
|     |                              | <b>SD</b>   | 0.52  | 0.83 | 0.50 |
|     |                              | <b>n</b>    | 4     | 4    | 4    |
| PMH | <i>Limodorum abortivum</i>   | <b>mean</b> | 13.72 | 5.06 | 2.16 |
|     |                              | <b>SD</b>   | 3.35  | 0.50 | 0.36 |
|     |                              | <b>n</b>    | 10    | 14   | 14   |
| PMH | <i>Limodorum trabutianum</i> | <b>mean</b> | 11.48 | 4.62 | 2.35 |
|     |                              | <b>SD</b>   | 3.46  | 1.03 | 0.20 |
|     |                              | <b>n</b>    | 5     | 5    | 5    |
| PMH | <i>Platanthera minor</i>     | <b>mean</b> | 10.91 | 3.70 | 1.57 |
|     |                              | <b>SD</b>   | 2.94  | 0.84 | 0.12 |
|     |                              | <b>n</b>    | 3     | 3    | 3    |

---
